# Supplementary material for: Copy Number Variant Detection with Low-Coverage Whole-Genome Sequencing Represents a Viable Alternative to the Conventional Array-CGH
Source: MDPI journal article supplement (doi:10.3390/diagnostics11040708), 2021-04-15

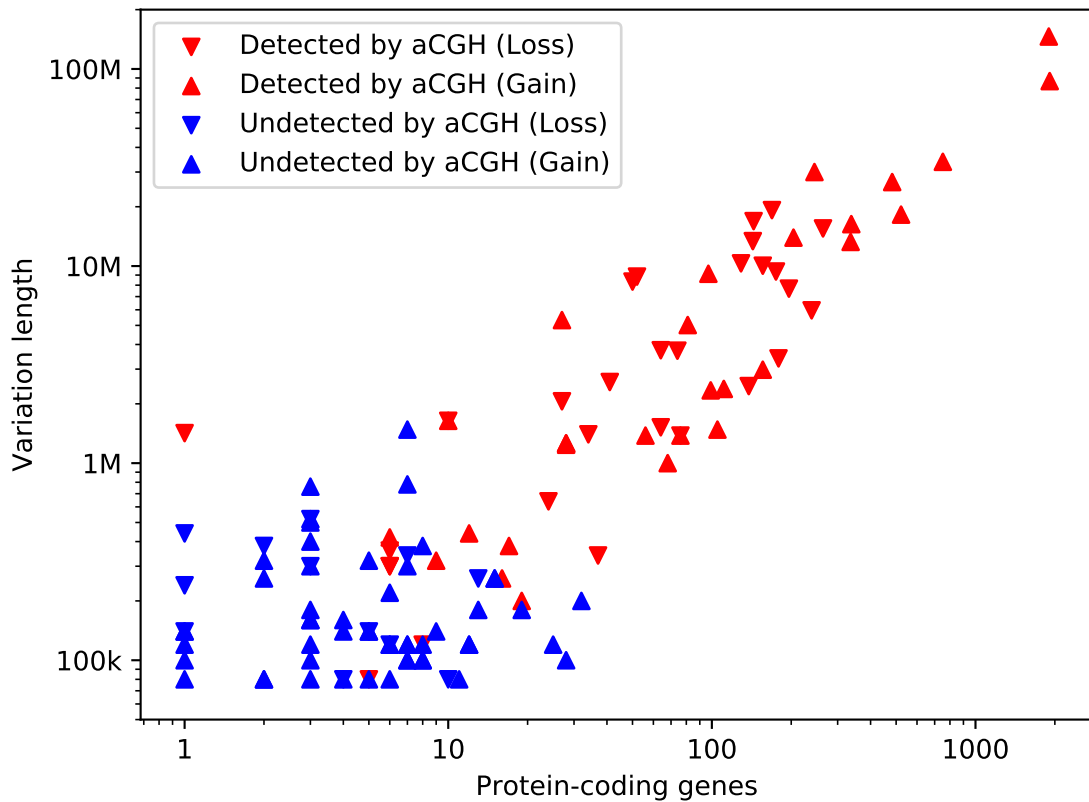

Supplement: s1 [file s1]
